# Supplementary material for: Molecular phylogenetic analyses support the monophyly of Hexapoda and suggest the paraphyly of Entognatha
Source: Springer Nature journal article supplement (doi:10.1186/1471-2148-13-236), 2013-10-31
Supplement: 12862_2013_2471_MOESM2_ESM.pdf [file 12862_2013_2471_MOESM2_ESM.pdf]

## CDS of DNA polymerase $\delta$ catalytic subunit (DPD1)

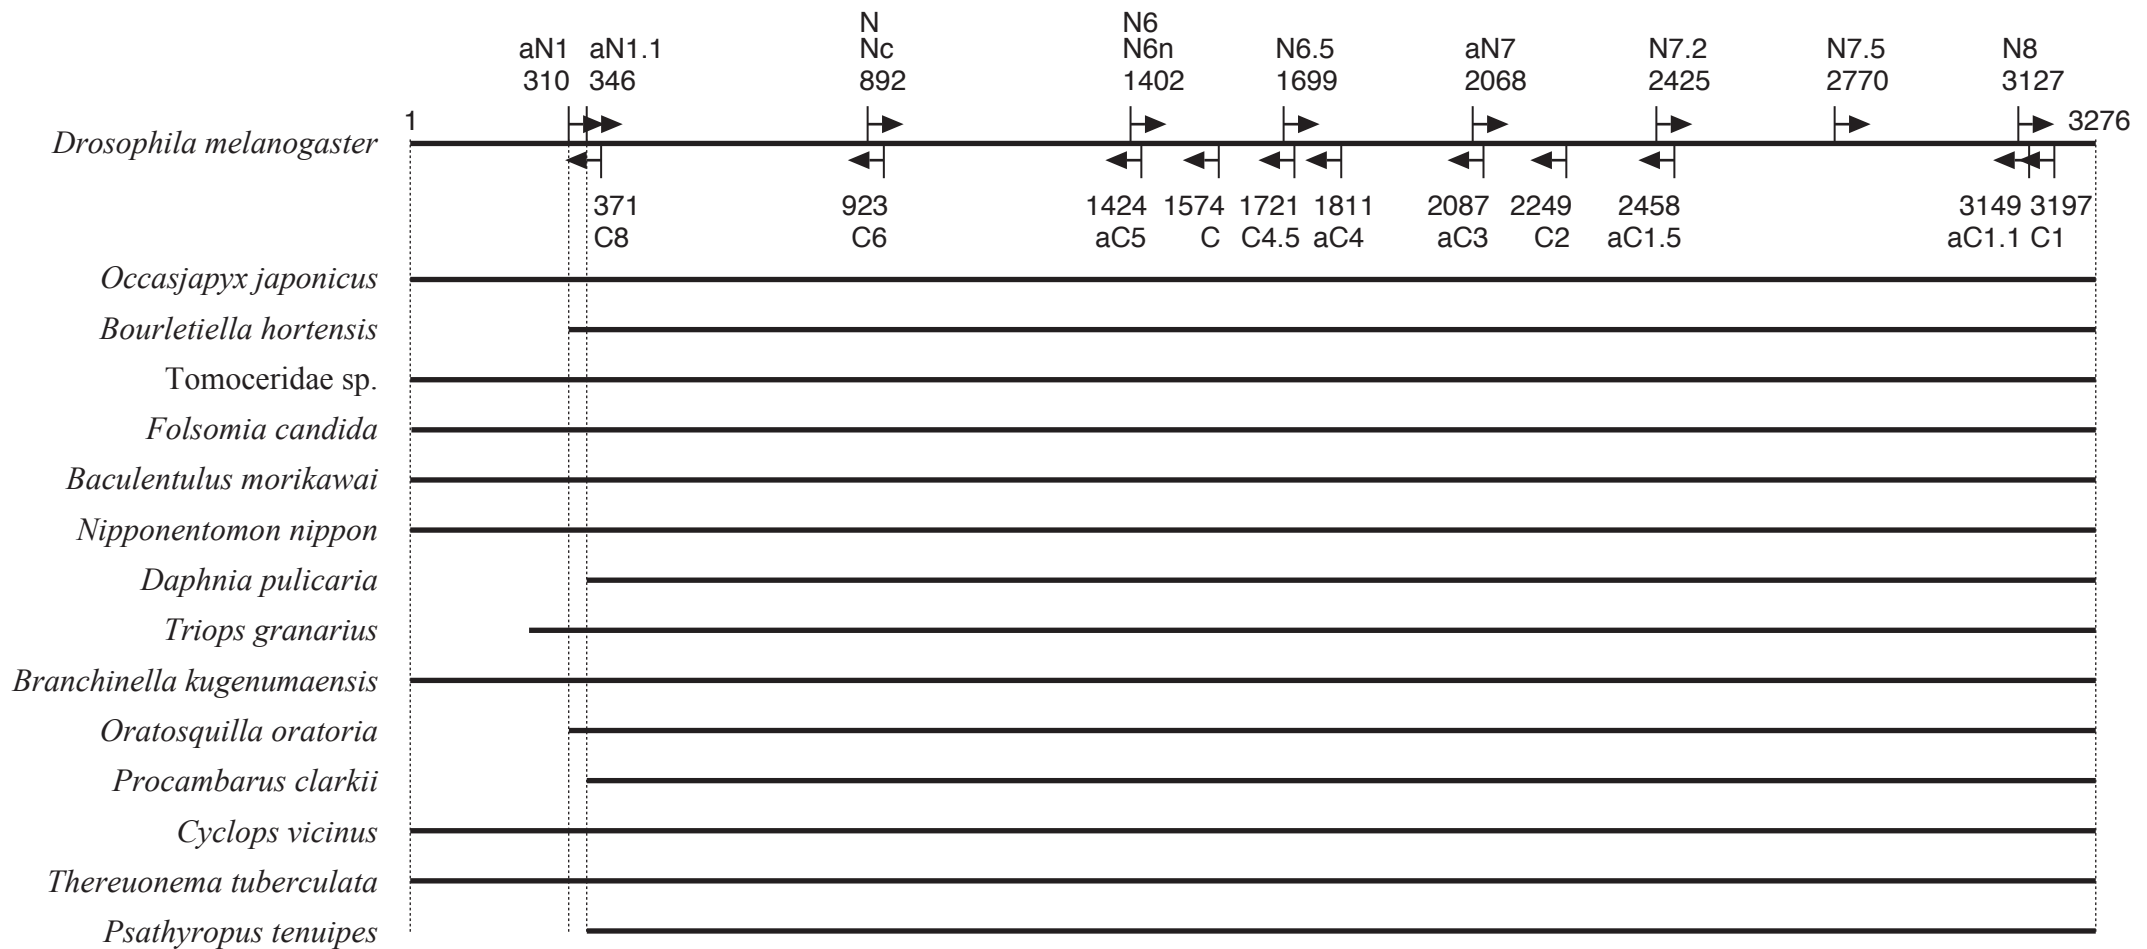

**Additional file 2.** The coding sequence (CDS) region of the catalytic subunit of DNA polymerase delta (DPD1) sequenced in this study. The lengths of the gene CDS are shown in accordance with those of *Drosophila melanogaster*. The locations of primers used for amplifying and sequencing are indicated on the gene CDS of *D. melanogaster*. The number above or below the primer name indicates the primer's position in the nucleotide sequence following the initiation codon. The primer names correspond to those shown in Additional file [Additional file 2](#).
