# Supplementary material for: Molecular phylogenetic analyses support the monophyly of Hexapoda and suggest the paraphyly of Entognatha
Source: Springer Nature journal article supplement (doi:10.1186/1471-2148-13-236), 2013-10-31
Supplement: 12862_2013_2471_MOESM4_ESM.pdf [file 12862_2013_2471_MOESM4_ESM.pdf]

## CDS of RNA polymerase II second largest subunit (RPB2)

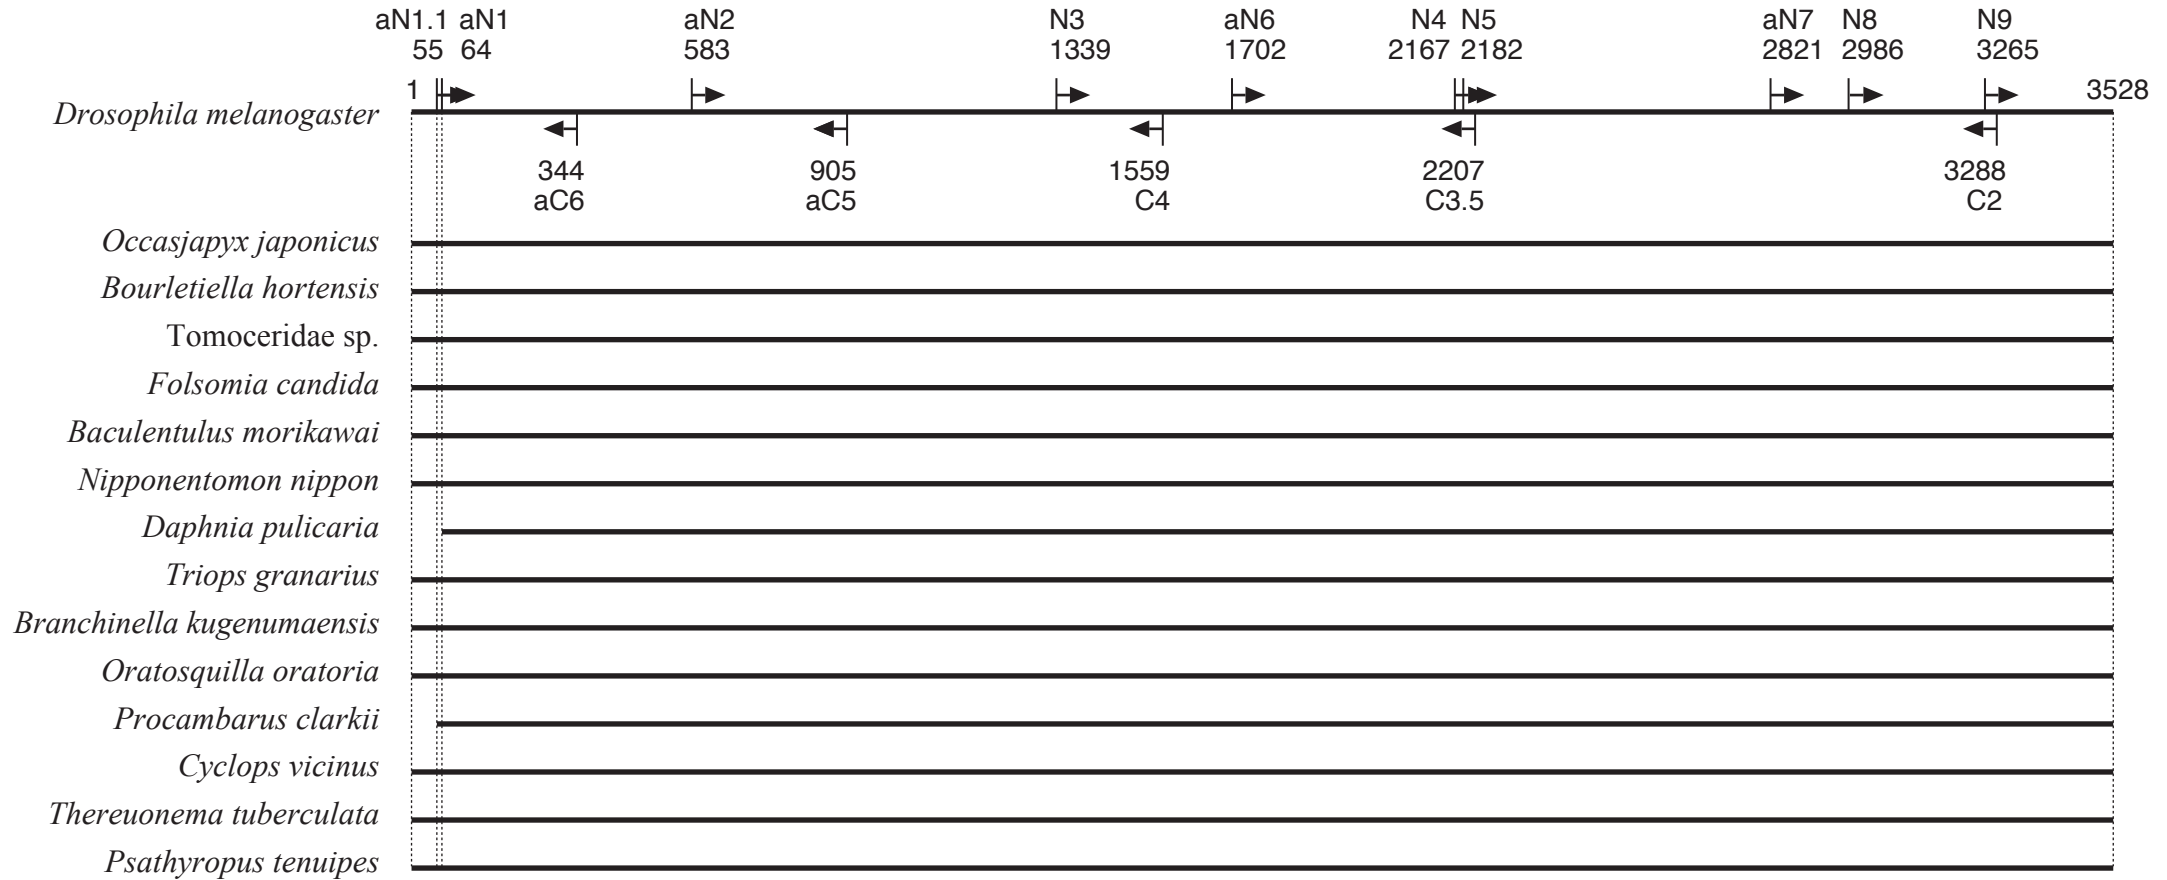

**Additional file 4.** The CDS region of the second largest subunit of RNA polymerase II (RPB2) sequenced in this study. For details, refer to Additional file 2.
