# Supplementary material for: Molecular phylogenetic analyses support the monophyly of Hexapoda and suggest the paraphyly of Entognatha
Source: Springer Nature journal article supplement (doi:10.1186/1471-2148-13-236), 2013-10-31
Supplement: 12862_2013_2471_MOESM6_ESM.pdf [file 12862_2013_2471_MOESM6_ESM.pdf]

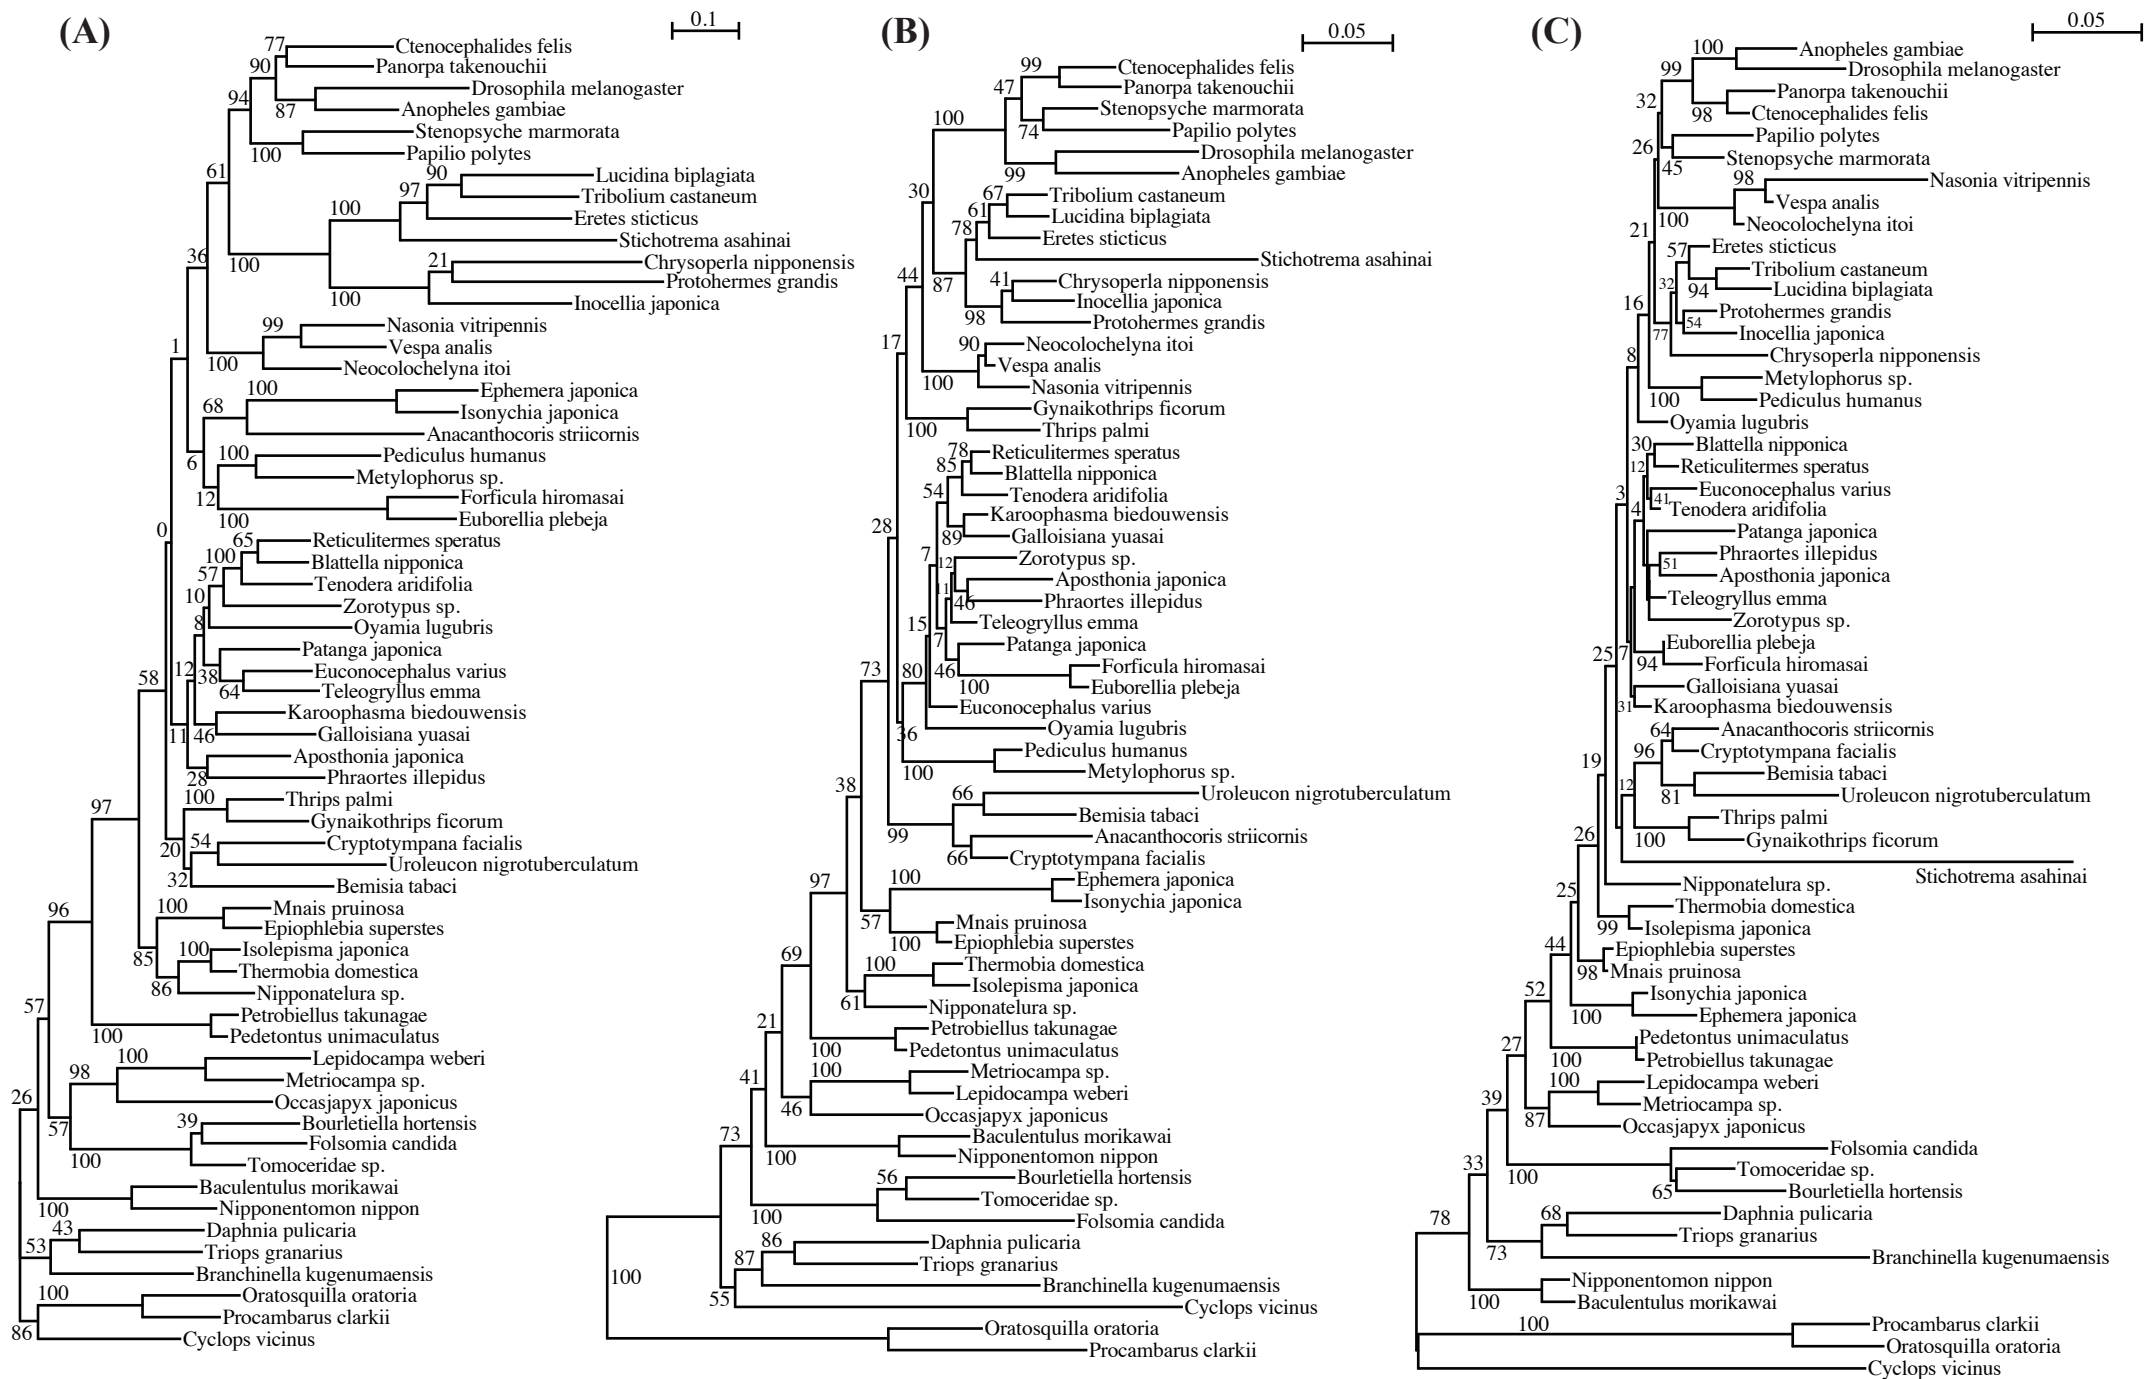

**Additional file 6.** The ML trees inferred from the individual genes of 61 samples (55 hexapods and 6 crustaceans). Bootstrap values from the RAxML analysis (LG model) are shown at nodes. A, DPD1 tree; B, RPB1 tree; C, RPB2 tree.
