# Supplementary material for: Molecular phylogenetic analyses support the monophyly of Hexapoda and suggest the paraphyly of Entognatha
Source: Springer Nature journal article supplement (doi:10.1186/1471-2148-13-236), 2013-10-31
Supplement: 12862_2013_2471_MOESM7_ESM.pdf [file 12862_2013_2471_MOESM7_ESM.pdf]

**Additional file 7.** The ML tree inferred from DPD1, RPB1, and RPB2. Eight taxa that show long branches in figure 2 were excluded in this analysis. Bootstrap values from the RAxML analysis (LG model), and posterior probabilities from the MCMC analysis (WAG model) of MrBayes are shown at nodes.

RAxML LG-CAT-F

DPD1 873aa  
 RPB1 1401aa  
 RPB2 1126aa  
 total 3400aa

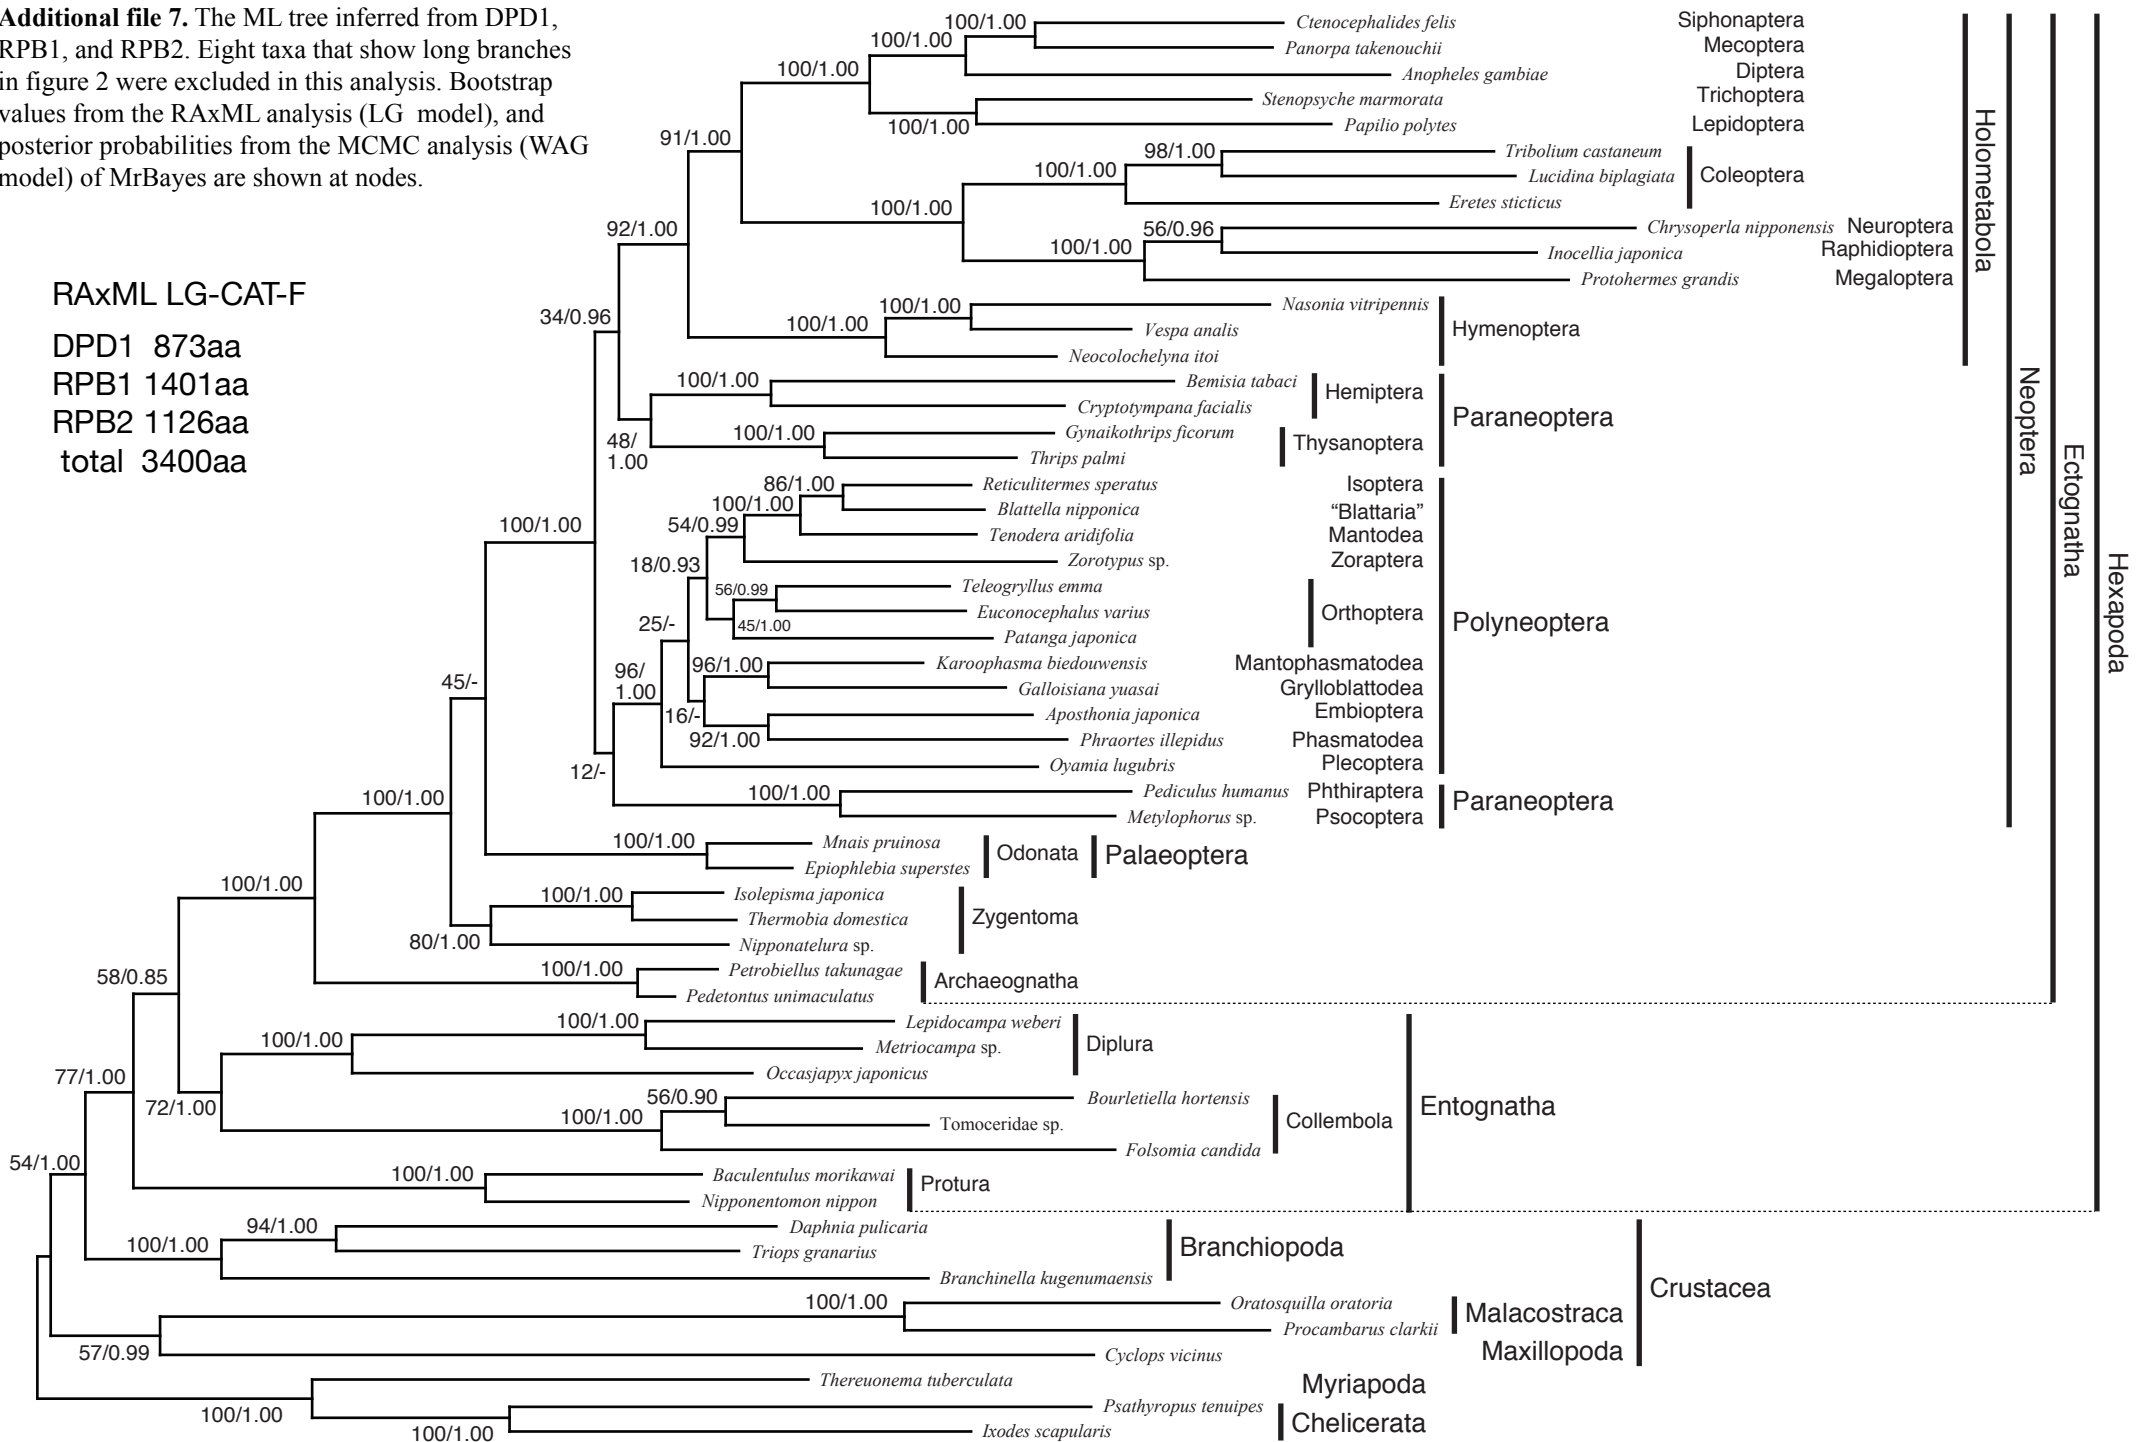

0.05
