# Supplementary material for: Molecular phylogenetic analyses support the monophyly of Hexapoda and suggest the paraphyly of Entognatha
Source: Springer Nature journal article supplement (doi:10.1186/1471-2148-13-236), 2013-10-31
Supplement: 12862_2013_2471_MOESM8_ESM.pdf [file 12862_2013_2471_MOESM8_ESM.pdf]

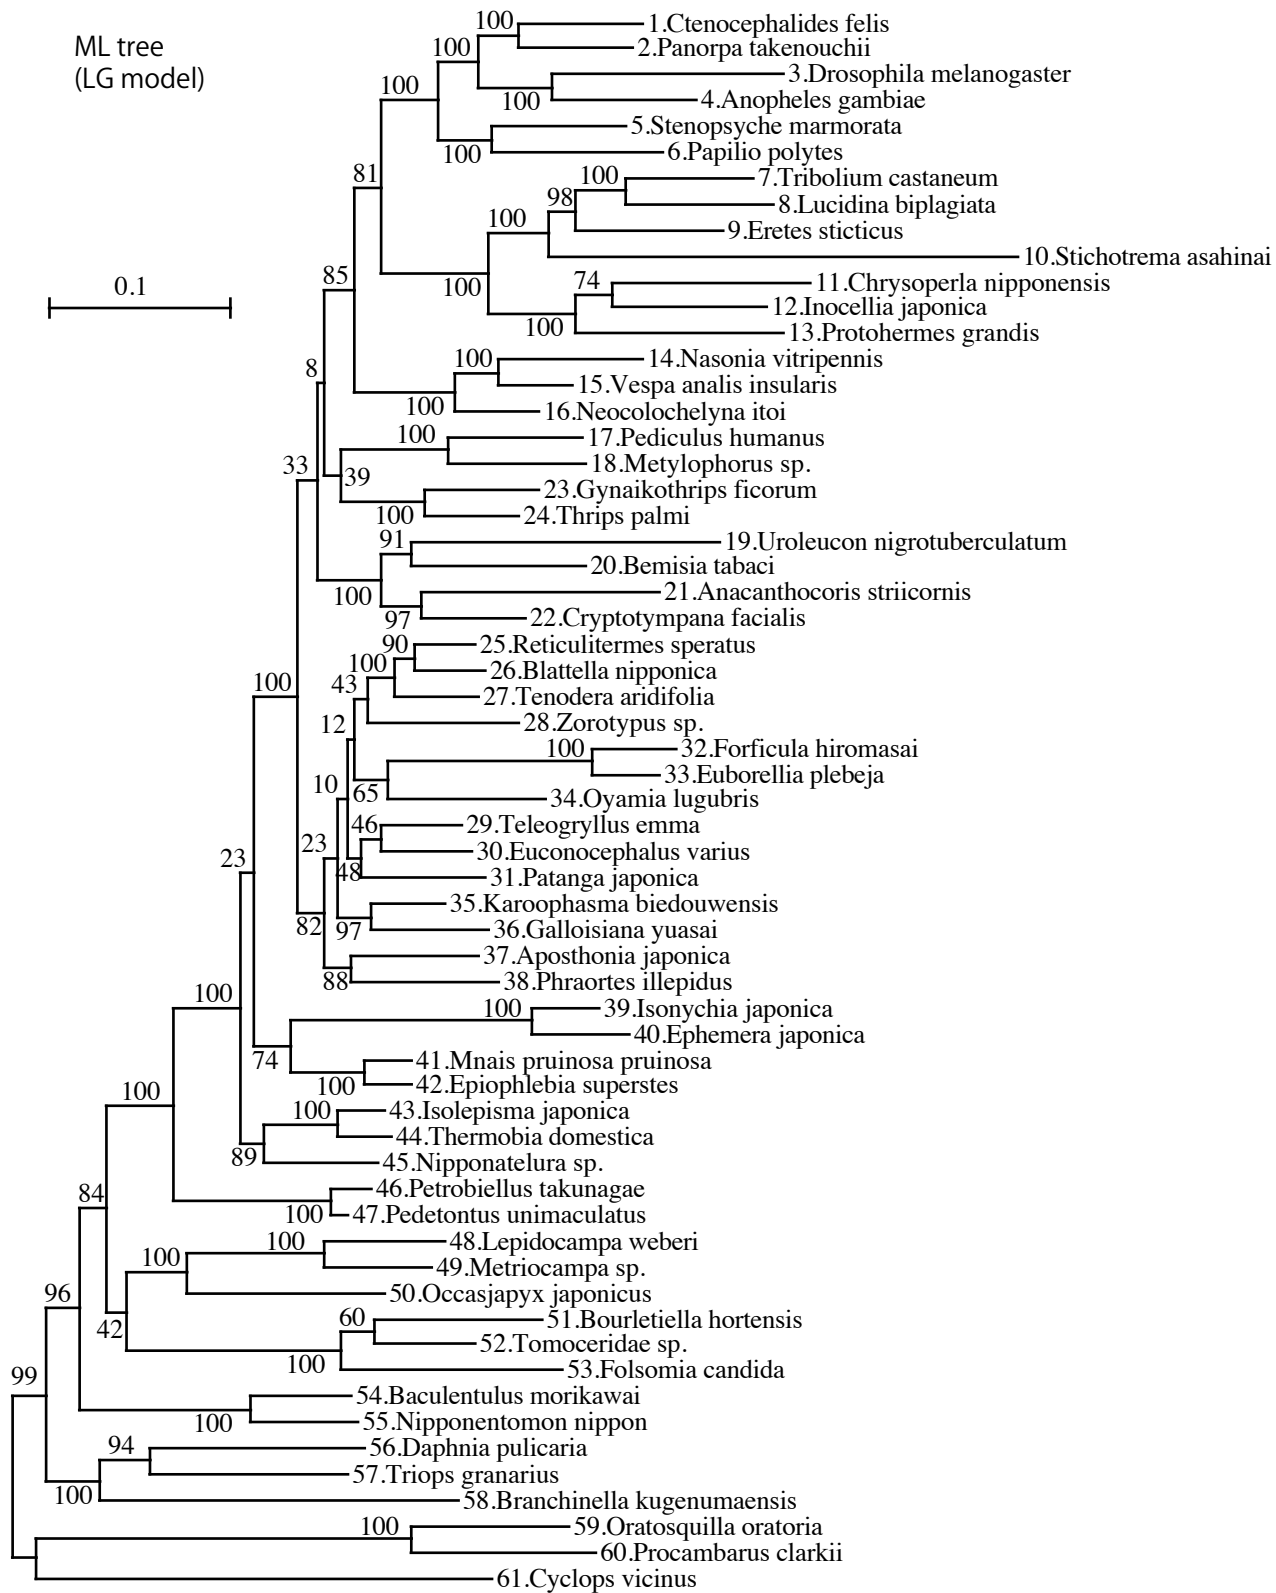

**Additional file 8.** ML tree based on LG model with 61 samples including 55 hexapods and 6 crustaceans.
