# Supplementary material for: Molecular phylogenetic analyses support the monophyly of Hexapoda and suggest the paraphyly of Entognatha
Source: Springer Nature journal article supplement (doi:10.1186/1471-2148-13-236), 2013-10-31
Supplement: 12862_2013_2471_MOESM10_ESM.pdf [file 12862_2013_2471_MOESM10_ESM.pdf]

ML tree  
(LG model)

DPD1 872  
RPB1 1416  
RPB2 1128  
Total 3416

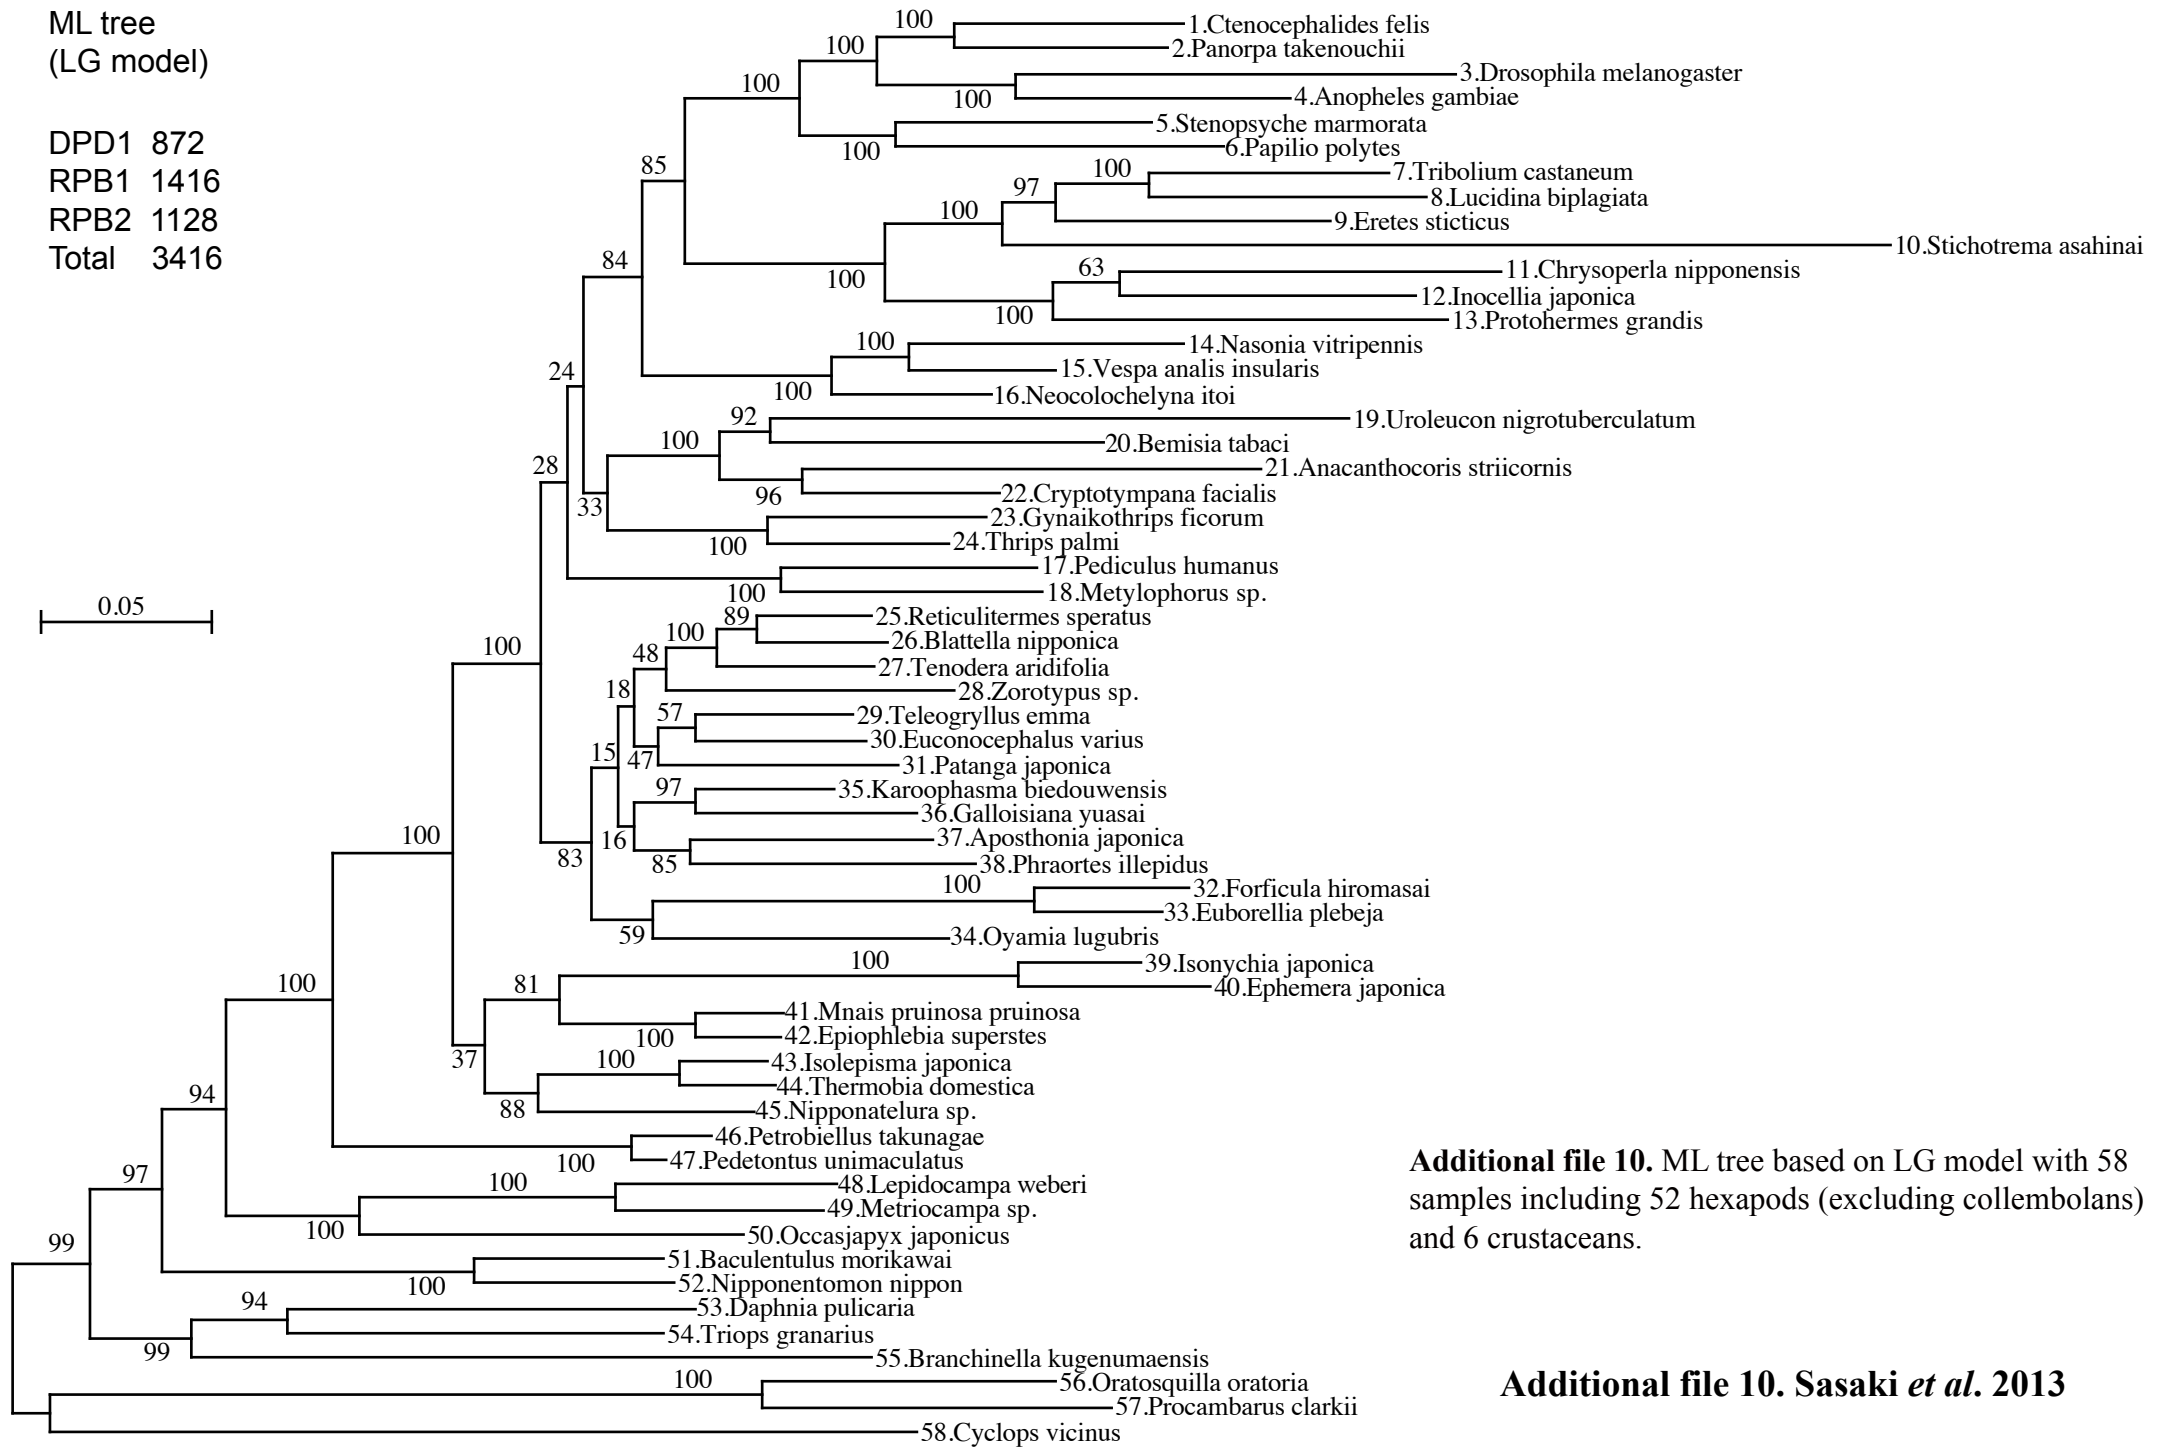

**Additional file 10.** ML tree based on LG model with 58 samples including 52 hexapods (excluding collembolans) and 6 crustaceans.
