# Supplementary figures and images for: Molecular phylogenetic analyses support the monophyly of Hexapoda and suggest the paraphyly of Entognatha
Source: Springer Nature journal article supplement (doi:10.1186/1471-2148-13-236), 2013-10-31

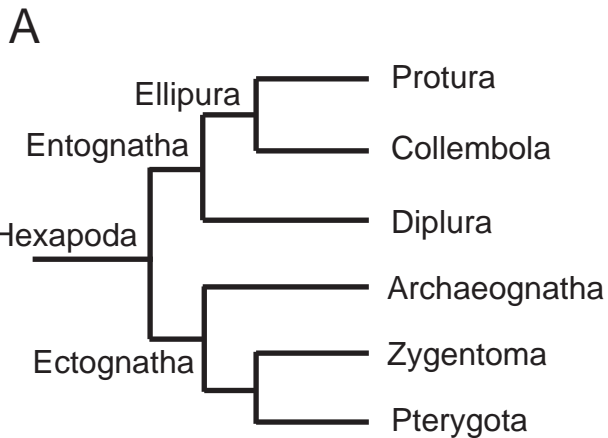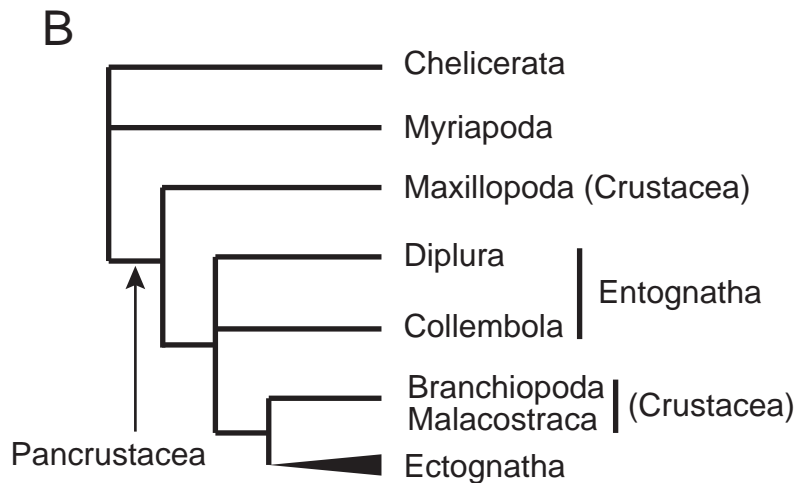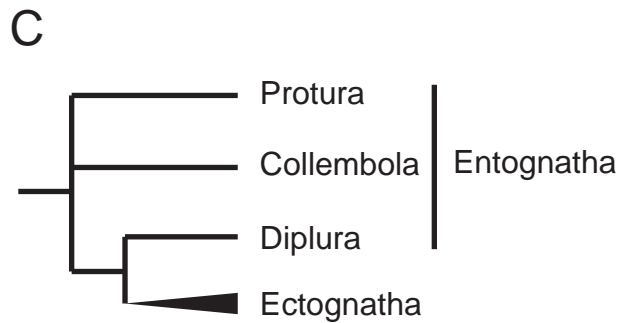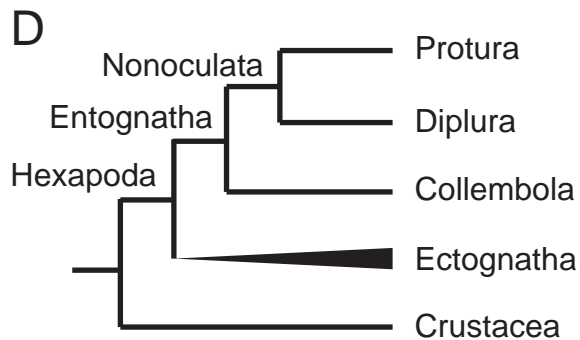

Supplement: 12862_2013_2471_MOESM13_ESM.pdf [file 12862_2013_2471_MOESM13_ESM.pdf]

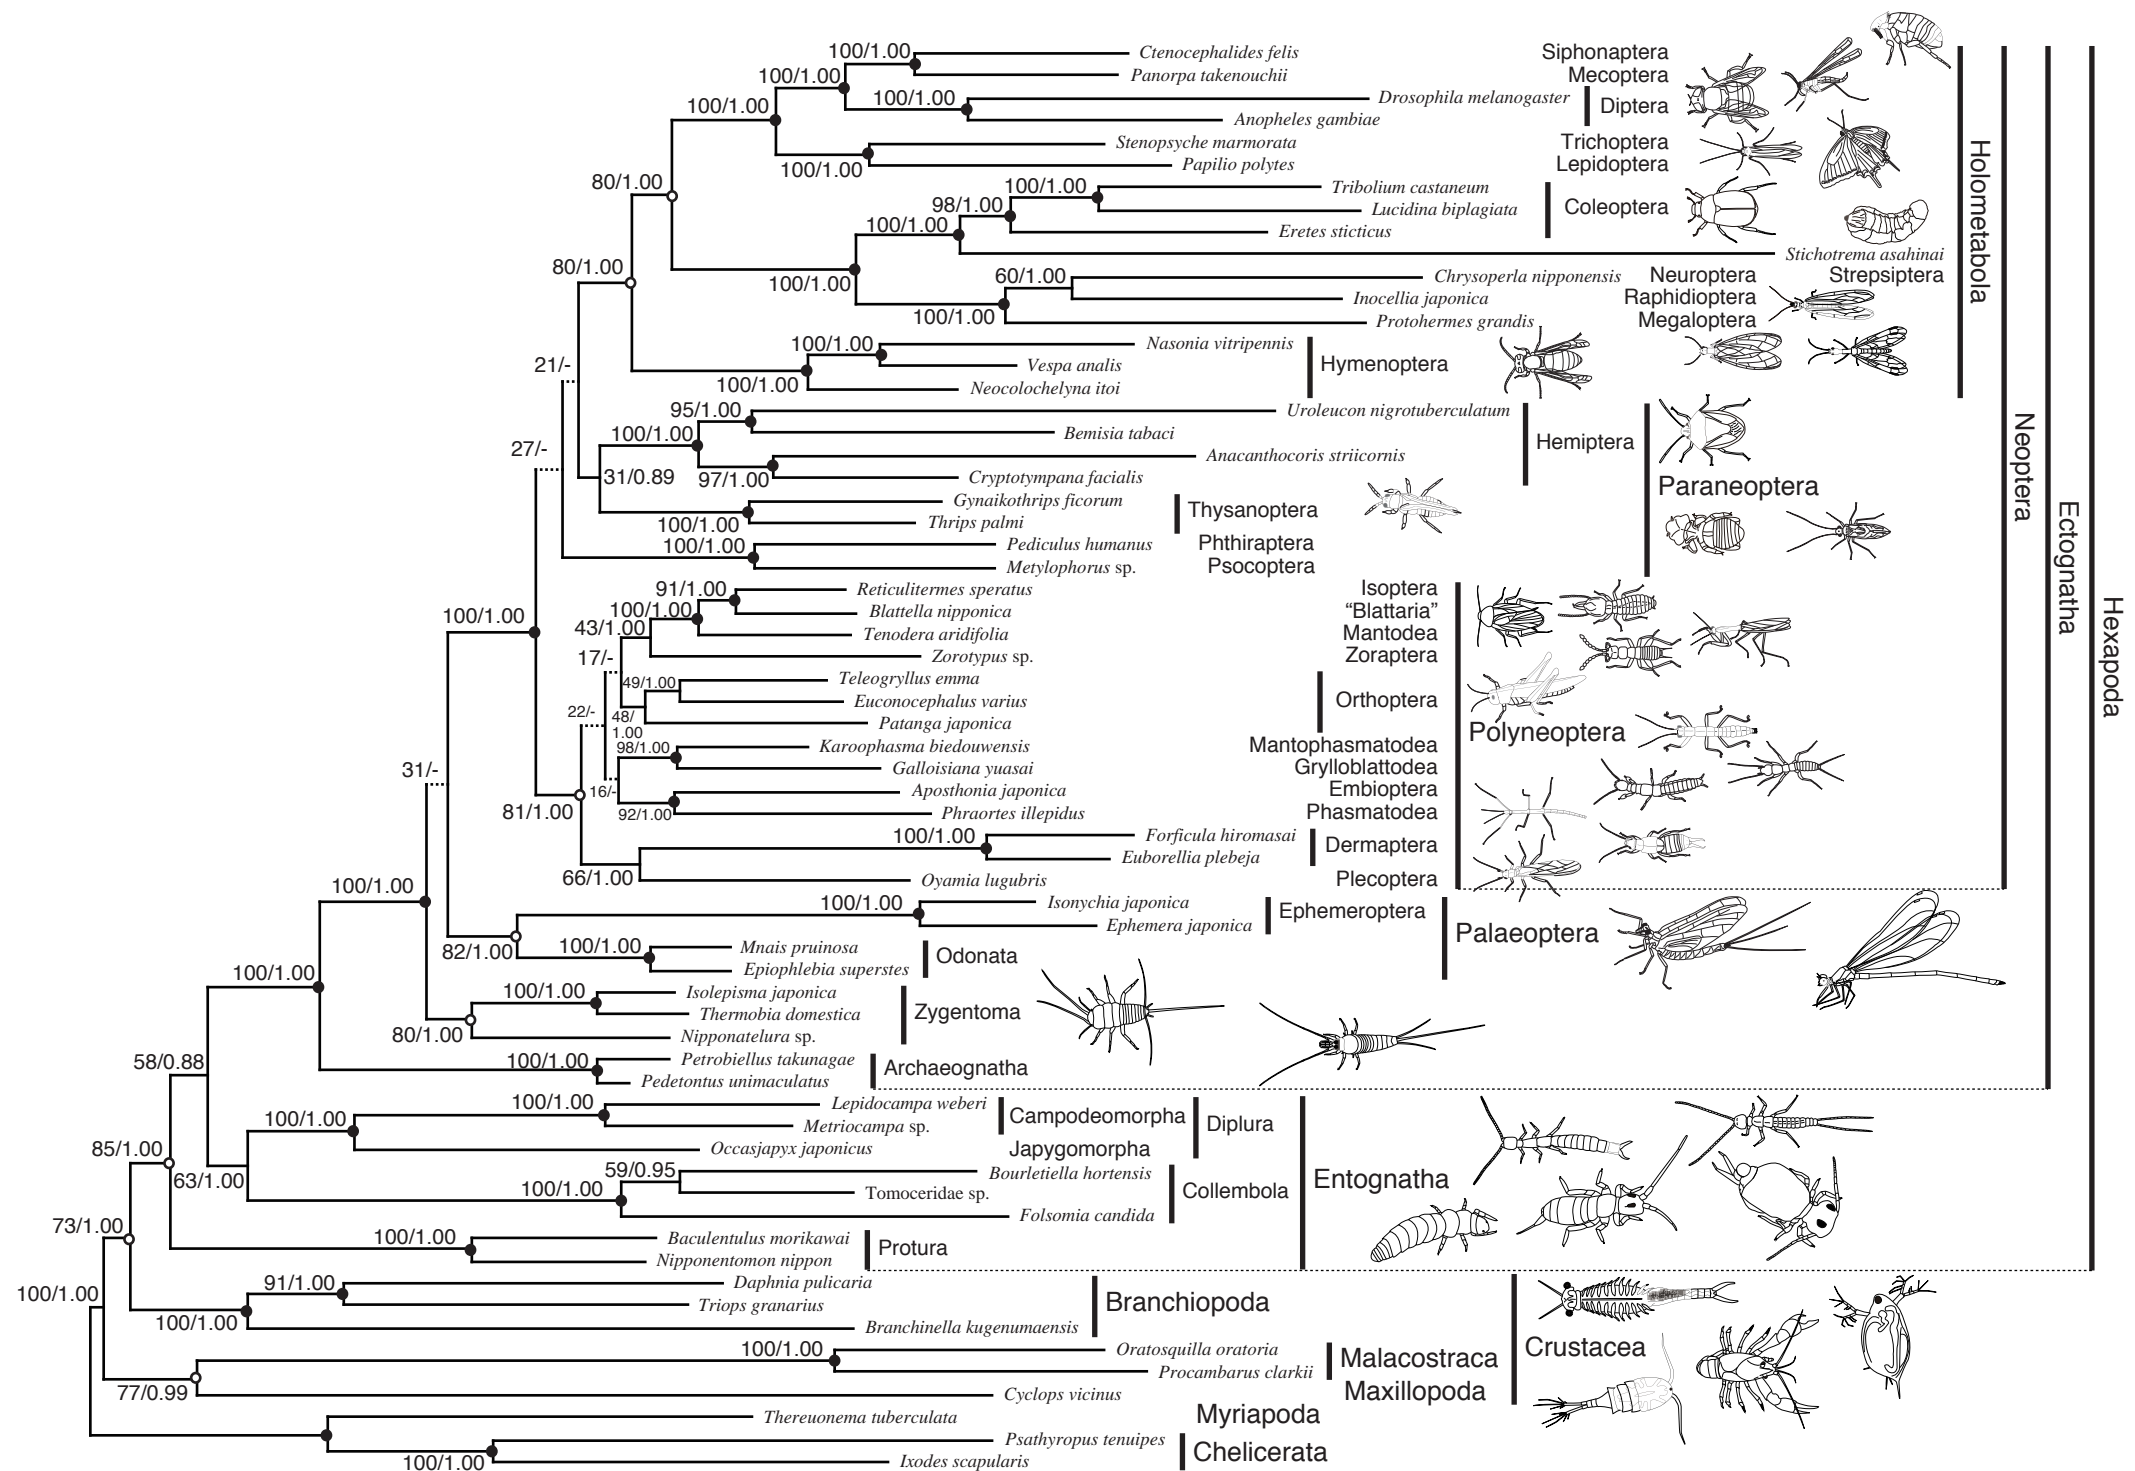

0.1

Supplement: 12862_2013_2471_MOESM14_ESM.pdf [file 12862_2013_2471_MOESM14_ESM.pdf]

A

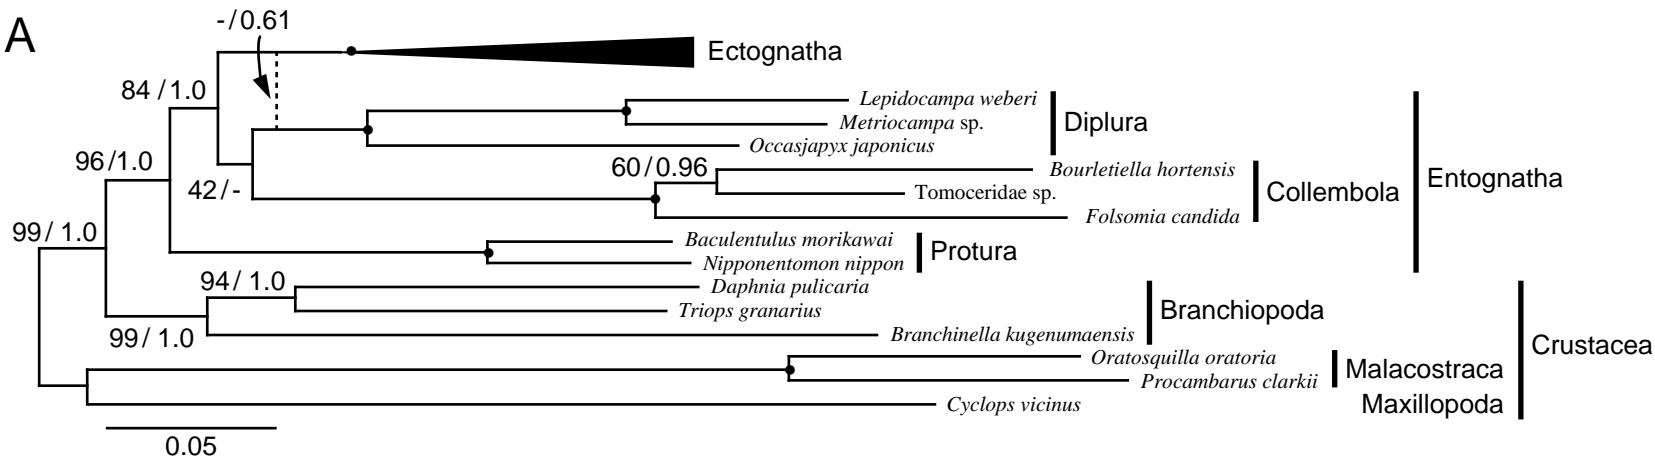

B

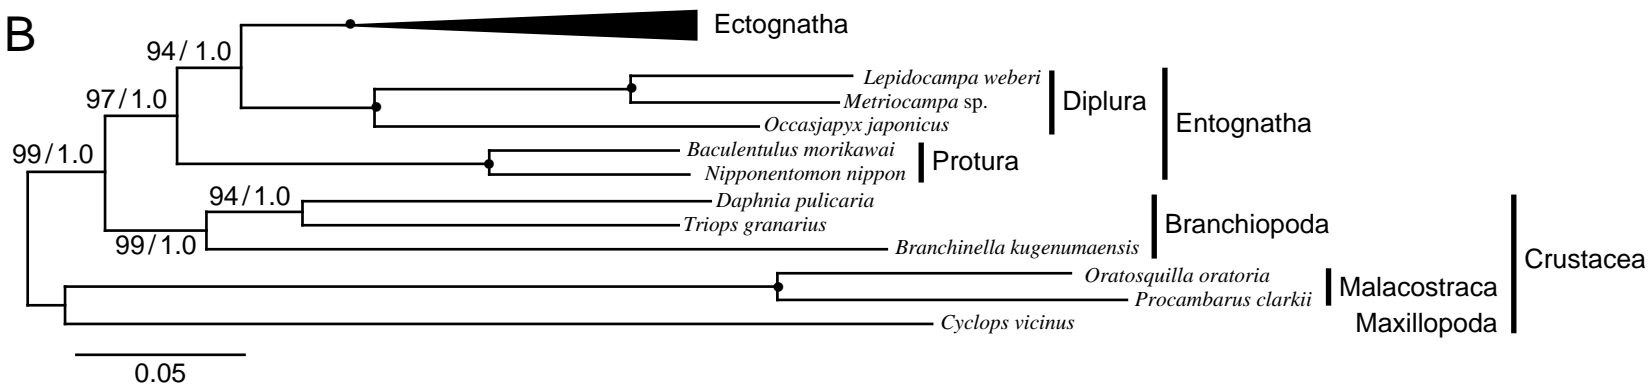

Supplement: 12862_2013_2471_MOESM15_ESM.pdf [file 12862_2013_2471_MOESM15_ESM.pdf]
